# Supplementary material
Source: Springer Nature journal article supplement (https://www.springermedizin.de/resource/supplementary/13014_2009_182_MOESM1_ESM.pdf/9633086)

**PTV 2, 53.8 Gy**  
**2.34Gy/fraction**

**PTV 1, 46Gy**  
**2Gy/fraction**

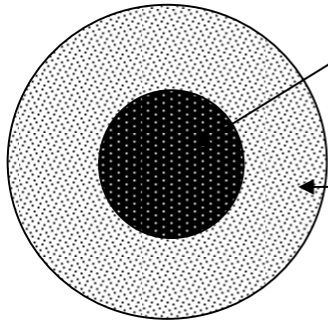

Supplement: MOESM1 [file 9633086]
